# Supplementary material
Source: publisher site journal article supplement (https://www.dovepress.com/article/240842)
Supplement: Supplementary file 1 [file get_supplementary_file.php]

**Supplementary materials 1**

Modified conceptual framework of the COPD-PRO

| Concept | Domain | Facet |
| --- | --- | --- |
| Patient-reported outcome | Physiological domain | Characteristic symptoms and their influencing factors, other symptoms and their influencing factors, ability of daily life, diet, sleep, stool and urine, cold, and prevention and treatment of disease |
| Psychological  domain | Concomitant emotion and impact of mood swings |
| Environmental domain | Season, day and night, region, poor ventilation and abnormal stimulating factors |
| Social domain | Social relations, social support, medical satisfaction, economic burden and health education |
| Satisfaction domain | Health satisfaction and treatment satisfaction |

**Abbreviations:** COPD-PRO, patient-reported outcome scale for chronic obstructive pulmonary disease.
